# Correction

*Structural and functional alterations in the androgen receptor in spinal bulbar muscular atrophy*

By I. J. McEWAN

Volume 29 Part 2 (2001) 222–227

Table 2 contained serious errors in the column under the “Repeat length” heading, and should have appeared as follows:

**Table 2**

**Polyglutamine repeats and AR protein aggregation**

SRC, steroid receptor co-activator; NEDD, neural precursor cell-expressed developmentally down-regulated; CBP, CREB (cAMP response element binding protein) binding protein.

| Repeat length                         | Aggregation |         |         | Cell death | Sequestered proteins    | Ref. |
|---------------------------------------|-------------|---------|---------|------------|-------------------------|------|
|                                       | Cytosol     | Nucleus | Hormone |            |                         |      |
| Gln <sub>46</sub> /Gln <sub>48</sub>  | +           |         | +       | Reduced    |                         | [37] |
| Gln <sub>48</sub>                     | +           | +       | +       |            | SRC, Hsps, Hdj-2, NEDD8 | [36] |
| Gln <sub>50</sub>                     | +           |         | –       | Increased  |                         | [38] |
| Gln <sub>52</sub>                     | +           |         | +       |            |                         | [29] |
| Gln <sub>66</sub> –Gln <sub>112</sub> | +           | +       |         | Increased  |                         | [35] |
| Gln <sub>77</sub>                     | +           |         | +       |            |                         | [39] |
| Gln <sub>112</sub>                    |             | +       |         | Increased  | CBP                     | [40] |
